# Supplementary material for: FLNC Expression Level Influences the Activity of TEAD-YAP/TAZ Signaling
Source: PubMed Central journal article supplement (PMC7696573; doi:10.3390/genes11111343), 2020-11-13
Supplement: genes-11-01343-s001.pdf [file genes-11-01343-s001.pdf]

**Supplementary table S1.** Oligonucleotide sequences used for CRISPR/Cas9 plasmid cloning, qPCR and sequencing.

| Gene                                     | Oligonucleotide sequence (5'-3') | Application                |
|------------------------------------------|----------------------------------|----------------------------|
| <i>Myh1</i> (Forw)                       | GCTGAGAGAAGCTACCACATT            | qPCR                       |
| <i>Myh1</i> (Rev)                        | ACAAAGGCGTAGTCGTATGG             | qPCR                       |
| <i>Myh4</i> (Forw)                       | CAACAGTGCAGAGCAGGGAAG            | qPCR                       |
| <i>Myh4</i> (Rev)                        | GGCCATGTCCTCAATCTTGTCGTAC        | qPCR                       |
| <i>Mymk</i> (Forw).                      | CCTGTGATGGGCCTGGTTTGTC           | qPCR                       |
| <i>Mymk</i> (Rev)                        | GGTTCATCAAAGTCGGCCAGTGC          | qPCR                       |
| <i>Myog</i> (Forw)                       | GAGACATCCCCCTATTTCTACCA          | qPCR                       |
| <i>Myog</i> (Rev)                        | GCTCAGTCCGCTCATAGCC              | qPCR                       |
| <i>Ctgf</i> (Forw)                       | CCCTAGCTGCCTACCGACT              | qPCR                       |
| <i>Ctgf</i> (Rev)                        | GTA ACTCGGGTGGAGATGCC            | qPCR                       |
| <i>Cyr61</i> (Forw)                      | CTGAAGAGGCTTCTGTCTTT             | qPCR                       |
| <i>Cyr61</i> (Rev)                       | GTGGTCTGAACGATGCATTTTC           | qPCR                       |
| <i>Flna</i> (Forw)                       | GCTAAAGGTCACTGTAAAGGGT           | qPCR                       |
| <i>Flna</i> (Rev)                        | TTCACCTCAAACGGACTTCGAC           | qPCR                       |
| <i>Flnb</i> (Forw)                       | GGGGAAAGTAACCTGCGTGA             | qPCR                       |
| <i>Flnb</i> (Rev)                        | CATGGCTGTGACTTCCCCAT             | qPCR                       |
| <i>Gapdh</i> (Forw)                      | GGATCTGACGTGCCGCCTG              | qPCR                       |
| <i>Gapdh</i> (Rev)                       | GAAGGTGGAAGAGTGGGAGTTGC          | qPCR                       |
| <i>Flnc</i> <i>_</i> guide sense         | CACCGTATTTCGGACGCCTCCGGCCT       | CRISPR plasmid cloning     |
| <i>Flnc</i> <i>_</i> guide antisense     | AAACAGGCCGGAGGCGTCCGAATAC        | CRISPR plasmid cloning     |
| <i>Scramble</i> <i>_</i> guide sense     | CACCGGTGCGAATACGCCACGCGAT        | CRISPR plasmid cloning     |
| <i>Scramble</i> <i>_</i> guide antisense | AAACATCGCGTGGCGTATTCGCACC        | CRISPR plasmid cloning     |
| <i>U6</i>                                | GAGGGCCTATTTCCCATGATTC           | Sequencing                 |
| <i>Flnc</i> <i>_</i> exon1 (Forw)        | GCGCTAACGAAGTCTCCGA              | Sequencing, allele cloning |
| <i>Flnc</i> <i>_</i> exon1 (Rev)         | TTGAGATGCTCGTTGCACCA             | Sequencing, allele cloning |

Supplementary Figure S1

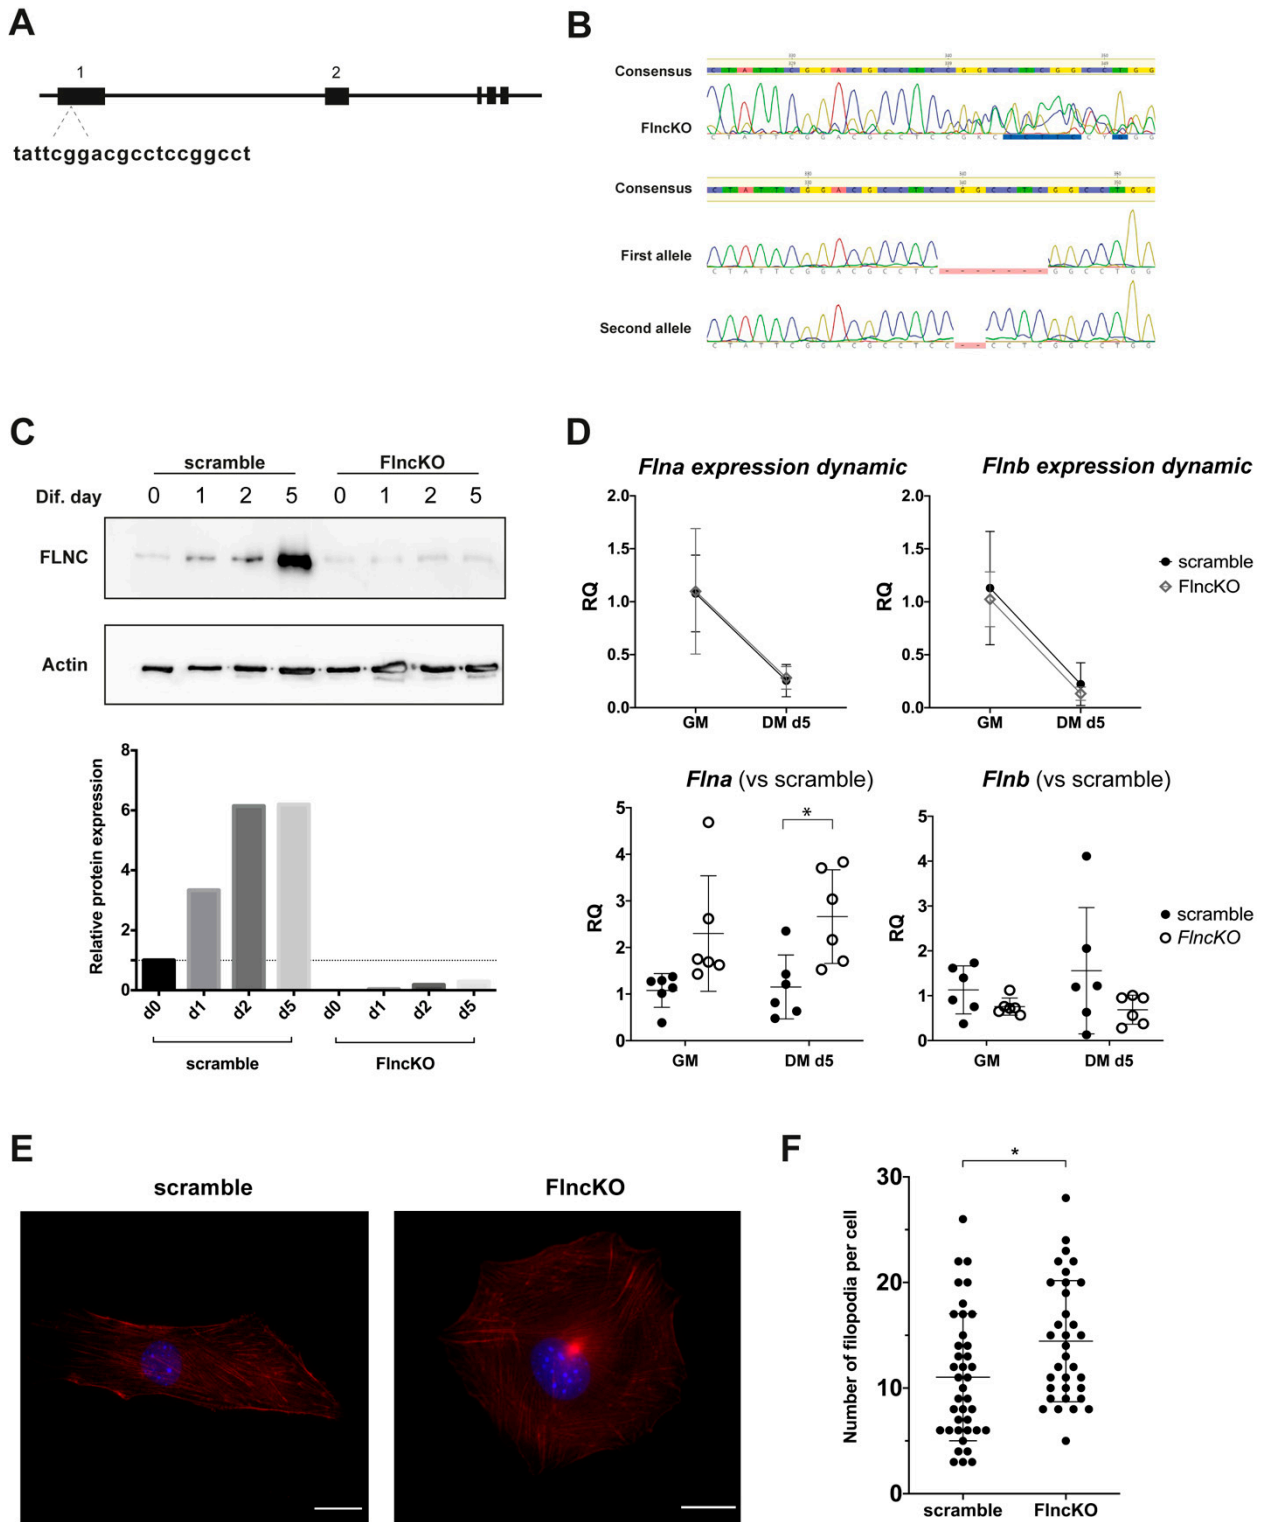

**Figure S1. Generation of FLNC-deficient C2C12 cell line using CRISPR/Cas9 technique.**

(A) GuideRNA-driven CRISPR/Cas9 genome editing performed within the first exon of mouse *Fln*. (B) Sanger sequencing of total cell DNA represents introduction of deletions 3 nucleotides upstream to PAM-site. TA-allele cloning revealed the presence of two different deletions in each allele (2 nt and 7 nt), no WT alleles was observed after screening of at least 20 TA-clones. (C) Western Blotting of *Fln*KO cells showed loss of FLNC in undifferentiated myoblasts with slight increase of FLNC during myogenic differentiation compared to a scramble cell line (control). (D) Expression dynamics of *Flna* and *Flnb* during myogenic differentiation in scramble control and *Fln*KO cells(upper panel), and changes of *Flna* and *Flnb* expression in *Fln*KO cells comparing to scramble control (lower panel). (E) Representative images of scramble control and *Fln*KO undifferentiated myoblasts stained with Phalloidin Rhodamine. (D) Quantification of filopodia sites per cell in undifferentiated *Fln*KO and scramble control myoblasts. GM – growth media, DM d5 – 5 days in differentiation media.\* $p < 0.05$ . Scale bar 20  $\mu\text{m}$ .
